# Supplementary material for: A comprehensive joint analysis of the long and short RNA transcriptomes of human erythrocytes
Source: PubMed Central journal article supplement (PMC4647483; doi:10.1186/s12864-015-2156-2), 2015-11-16
Supplement: 12864_2015_2156_MOESM1_ESM.pdf [file 12864_2015_2156_MOESM1_ESM.pdf]

# FIGURE S1

## A

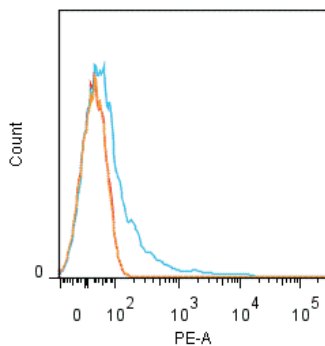

|                                                                                   | Sample Name       |
|-----------------------------------------------------------------------------------|-------------------|
|  | CD71 unsorted.fcs |
|  | CD71 positive.fcs |
|  | CD71 negative.fcs |

## B

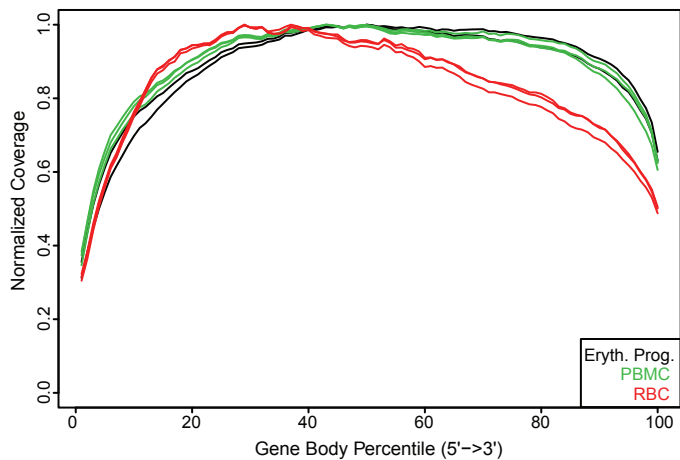

# FIGURE S2

chr22:20012651..20012708:-

| Reads | Star Sequence                | Mature MicroRNA Sequence | Reads   |
|-------|------------------------------|--------------------------|---------|
| 3     | CTGAGAGGCAGAGGTTGCAG         | CACTGCAACCTCTGCCTCCGG    | 86      |
| 4     | CTGAGAGGCAGAGGTTGCAGT        | CACTGCAACCTCTGCCTCCGGTA  | 87      |
| 4     | CTGAGAGGCAGAGGTTGCAGTG       | CACTGCAACCTCTGCCTCCGGA   | 123     |
|       | ttgaacCTGAGAGGCAGAGGTTGCAGTG | CACTGCAACCTCTGCCTCCGGT   | 304     |
|       | Gcagcatctcagg                | CACTGCAACCTCTGCCTCCGGT   | tattcaa |

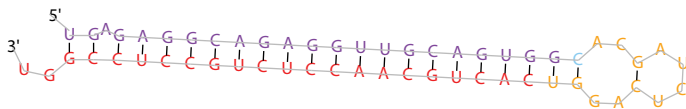

| Relative Genomic Location | miRDeep score | Total Reads per sample |          |          |          |          |
|---------------------------|---------------|------------------------|----------|----------|----------|----------|
|                           |               | Sample 1               | Sample 2 | Sample 3 | Sample 4 | Sample 5 |
| Intron, TANGO2            | 660           | 0                      | 1269     | 0        | 0        | 403      |

chr7:1538188..1538248:-

| Reads | Star Sequence              | Mature MicroRNA Sequence | Reads |
|-------|----------------------------|--------------------------|-------|
| 1     | GCCCTGGCCTGGATCCATGCTG     | CTGGACACTGACCAGGACCCCT   | 16    |
|       | ggggGCCCTGGCCTGGATCCATGCTG | CTGGACACTGACCAGGACCCCT   | 30    |
|       | ggcagaagcag                | CTGGACACTGACCAGGACCCCG   | 2     |
|       |                            | TGGACACTGACCAGGACCCCCag  |       |

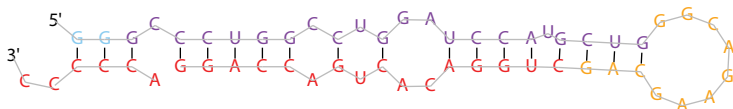

| Relative Genomic Location | miRDeep score | Total Reads per sample |          |          |          |          |
|---------------------------|---------------|------------------------|----------|----------|----------|----------|
|                           |               | Sample 1               | Sample 2 | Sample 3 | Sample 4 | Sample 5 |
| Intron, EGFL1             | 1.6           | 0                      | 112      | 17       | 0        | 49       |

# FIGURE S3

## hsa-miR-486-5p

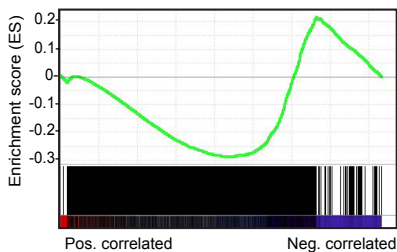

Number genes with targets: 4961      nominal p-value: 1  
FDR q-value: 1

## hsa-miR-92a-3p

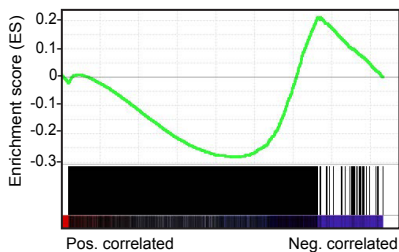

Number genes with targets: 4773      nominal p-value: 1  
FDR q-value: 1

## hsa-miR-16-5p

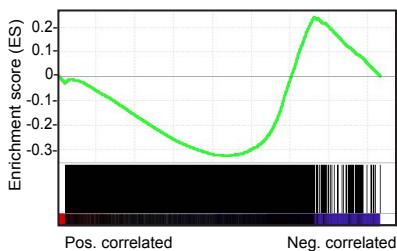

Number genes with targets: 6787      nominal p-value: 1  
FDR q-value: 1

## hsa-let-7a/f

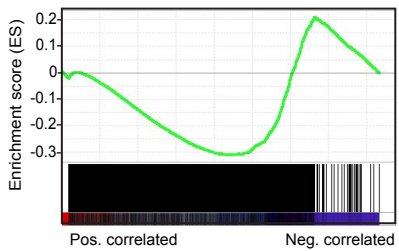

Number genes with targets: 4074      nominal p-value: 1  
FDR q-value: 1

## hsa-miR-451

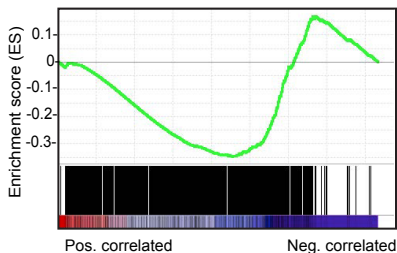

Number genes with targets: 1129      nominal p-value: 1  
FDR q-value: 1

**FIGURE S4**

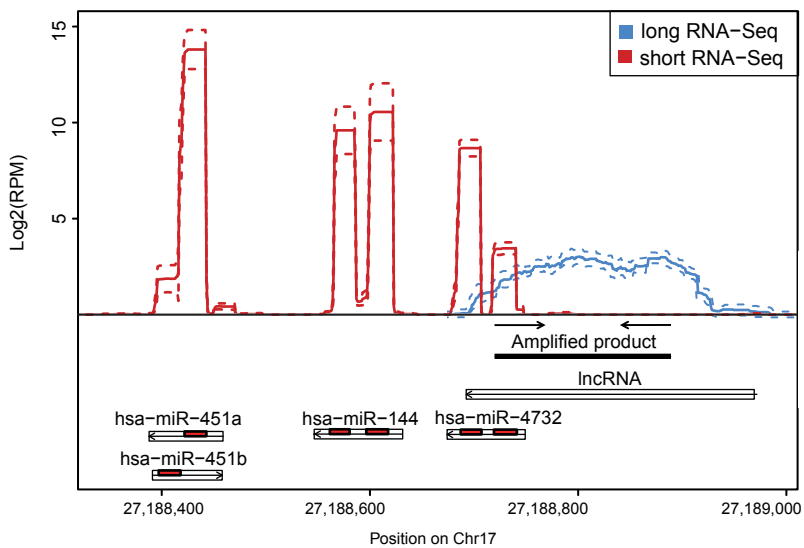

| lncRNA |      | GAPDH |      |
|--------|------|-------|------|
| + RT   | - RT | + RT  | - RT |

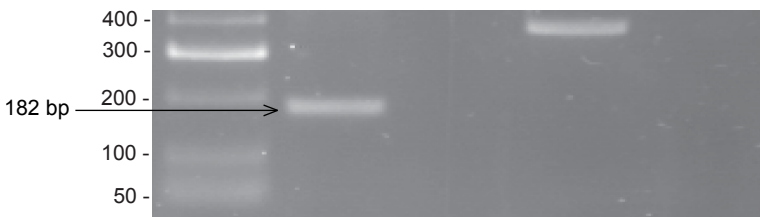

**FIGURE S5**

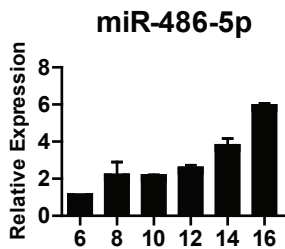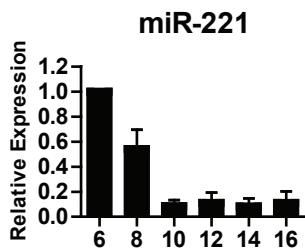

# FIGURE S6

## miR-451a

|             |                        |
|-------------|------------------------|
| Human       | AAACCGTTACCATTACTGAGTT |
| Chimpanzee  | AAACCGTTACCATTACTGAGTT |
| Gorilla     | AAACCGTTACCATTACTGAGTT |
| Orangutan   | AAACCGTTACCATTACTGAGTT |
| Macaque     | AAACCGTTACCATTACTGAGTT |
| Mouse Lemur | AAACCGTTACCATTACTGAGTT |
| Rat         | AAACCGTTACCATTACTGAGTT |
| Mouse       | AAACCGTTACCATTACTGAGTT |
| Rabbit      | AAACCGTTACCATTACTGAGTT |
| Cow         | AAACCGTTACCATTACTGAGTT |
| Dog         | AAACCGTTACCATTACTGAGTT |
| Cat         | AAACCGTTACCATTACTGAGTT |
| Horse       | AAACCGTTACCATTACTGAGTT |
| Chicken     | AAACCGTTACCATTACTGAGTT |

## miR-144-3p

|             |                      |
|-------------|----------------------|
| Human       | TACAGTATAGATGATGTACT |
| Chimpanzee  | TACAGTATAGATGATGTACT |
| Gorilla     | TACAGTATAGATGATGTACT |
| Orangutan   | TACAGTATAGATGATGTACT |
| Macaque     | TACAGTATAGATGATGTACT |
| Mouse Lemur | TACAGTATAGATGATGTACT |
| Rat         | TACAGTATAGATGATGTACT |
| Mouse       | TACAGTATAGATGATGTACT |
| Rabbit      | TACAGTATAGATGATGTACT |
| Cow         | TACAGTATAGATGATGTACT |
| Dog         | TACAGTATAGATGATGTACT |
| Cat         | TACAGTATAGATGATGTACT |
| Horse       | TACAGTATAGATGATGTACT |
| Chicken     | TACAGTATAGATGATGTACT |

## miR-144-5p

|             |                         |
|-------------|-------------------------|
| Human       | GGATATCA TCATATACTGTAAG |
| Chimpanzee  | GGATATCA TCATATACTGTAAG |
| Gorilla     | GGATATCA TCATATACTGTAAG |
| Orangutan   | GGATATCA TCATATACTGTAAG |
| Macaque     | GGATATCA TCATATACTGTAAG |
| Mouse Lemur | GGATATCA TCATATACTGTAAG |
| Rat         | GGATATCA TCATATACTGTAAG |
| Mouse       | GGATATCA TCATATACTGTAAG |
| Rabbit      | GGATATCA TCATATACTGTAAG |
| Cow         | GGATATCA TCATATACTGTAAG |
| Dog         | GGATATCA TCATATACTGTAAG |
| Cat         | GGATATCA TCATATACTGTAAG |
| Horse       | GGATATCA TCATATACTGTAAG |
| Chicken     | GGATATCA TCATATACTGTAAG |
